# Supplementary material
Source: HighWire-hosted journal article supplement (https://www.cmajopen.ca/highwire/filestream/81170/field_highwire_adjunct_files/0/2018-0080-original-submission.pdf)
Supplement: 2018-0080-original-submission.pdf [file 2018-0080-original-submission.pdf]

# A population-based cohort study of readmissions following hypoxic ischemic brain injury

Vincy Chan PhD<sup>1</sup>, David Stock PhD<sup>1,2</sup>, Binu Jacob MSc PhD<sup>1</sup>, Nora Cullen MD<sup>1,3,4</sup>, Angela Colantonio PhD OT Reg. (Ont.)<sup>1,4,5</sup>

<sup>1</sup>Toronto Rehabilitation Institute, University Health Network, Toronto, Canada

<sup>2</sup>Clinical Health and Epidemiology, Dalhousie University, Halifax, Canada

<sup>3</sup>West Park Healthcare Centre, Toronto, Canada

<sup>4</sup>Rehabilitation Sciences Institute, University of Toronto, Toronto, Canada

<sup>5</sup>Institute for Clinical Evaluative Sciences, Toronto, Canada

**Corresponding Author:** Vincy Chan PhD, Toronto Rehabilitation Institute-UHN, 160-500 University Avenue, Toronto, ON, M5G 1V7. Email address: [Vincy.Chan@uhn.ca](mailto:Vincy.Chan@uhn.ca).

**Word Count:** 2,464

**Abstract word count:** 250

**Number of Tables/Figures:** 2/0

**Competing interests:** None declared.

**Keywords:** Hypoxic Ischemic brain injury, readmission, acute care, health services utilization

**Funding:** This project was funded by the Physicians' Services Incorporated (PSI) Foundation and the Canadian Institutes of Health Research (CIHR) Project Grant.

1  
2  
3 1 **ICES disclaimer and Acknowledgments:** This study was supported through provision of data by  
4  
5  
6 2 the Institute for Clinical Evaluative Sciences (ICES) and Cancer Care Ontario (CCO) and through  
7  
8 3 funding support to ICES from an annual grant by the Ministry of Health and Long-Term Care  
9  
10 4 (MOHLTC) and the Ontario Institute for Cancer Research (OICR). The opinions, results, and  
11  
12 5 conclusions reported in this paper are those of the authors and are independent from the  
13  
14 6 funding sources. No endorsement by ICES, CCO, OICR, or the Government of Ontario is  
15  
16 7 intended or should be inferred. Parts of this material are based on data and information  
17  
18 8 compiled and provided by CIHI. However, the analyses, conclusions, opinions, and statements  
19  
20 9 expressed herein are those of the author, and not necessarily those of CIHI.  
21  
22  
23  
24  
25  
26  
27

10

11 **Contributions:** Vincy Chan, David Stock, Nora Cullen and Angela Colantonio conceptualized and  
12 designed the study. David Stock formulated the methodology and carried out the statistical  
13 analyses. Vincy Chan and Binu Jacob drafted the manuscript, and all authors had significant  
14 input into the editing and interpretation of data, and read and approved the final manuscript.  
15  
16

15

16

1  
2  
3 **1 ABSTRACT**  
4

5  
6 **2 Background:** Readmission to acute care is common and associated with indicators of  
7  
8 **3** suboptimal care and health system inefficiencies. The objective of this study was to identify  
9  
10 **4** independent predictors of readmission following survival of hypoxic-ischemic brain injury (HIBI).  
11  
12

13 **5**  
14  
15 **6 Methods:** A population-based retrospective cohort study was conducted using Ontario's  
16  
17 administrative health data. HIBI survivors age 20 years or older discharged from acute care  
18  
19 between fiscal years 2002/03 and 2010/11 (N=593) were included. Multivariable negative  
20  
21 binomial regression was used to identify independent predictors of both number of  
22  
23 **9** readmissions and cumulative readmission duration during one-year post index discharge.  
24  
25 **10**  
26  
27

28 **11**  
29  
30 **12 Results:** Almost 40% of HIBI patients were readmitted within one-year of index acute care  
31  
32 discharge. Number of readmissions was associated with age (35-49 vs. 65-79 years RR: 0.57;  
33  
34 95% CI: 0.38-0.85 and ≥80 vs. 65-79 years RR: 0.58; 95% CI: 0.34-0.97) and higher comorbidity  
35  
36 score (ADG score >30 vs. < 10 RR: 1.60; 95% CI: 1.11-2.31). Duration of readmission was  
37  
38 associated with increased index hospital length of stay (31-90 vs. ≥ 90 days RR: 4.17; 95% CI:  
39  
40 1.38-12.64), prior health services use (minimal vs. very high RR: 0.15; 95% CI: 0.05-0.49), and  
41  
42 discharge disposition (home vs. continuing care RR: 0.44; 95% CI: 0.21-0.91).  
43  
44  
45 **18**  
46  
47

48 **19**  
49  
50 **20 Interpretation:** This is the first population-wide study examining risk factors for readmission  
51  
52 following HIBI. Findings indicate a high readmission rate in the first year, reflecting care gaps  
53  
54  
55  
56  
57  
58  
59  
60

1  
2  
3  
4  
5  
6  
7  
8  
9  
10  
11  
12  
13  
14  
15  
16  
17  
18  
19  
20  
21  
22  
23  
24  
25  
26  
27  
28  
29  
30  
31  
32  
33  
34  
35  
36  
37  
38  
39  
40  
41  
42  
43  
44  
45  
46  
47  
48  
49  
50  
51  
52  
53  
54  
55  
56  
57  
58  
59  
60

1 and system inefficiencies. This suggests that bolstered discharge and home care planning and  
2 support are needed to address the specific needs of those living with HIBI.

Confidential

## 1 Introduction

2 Hypoxic ischemic brain injury (HIBI) is a non-traumatic brain injury (nTBI) that results from  
3 sustained oxygen deprivation arising from ischemic (i.e., restricted blood flow) or  
4 anoxic/hypoxic (i.e., no/low oxygen irrespective of ischemia) origins.<sup>1,2</sup> The common causes of  
5 HIBI are cardiac or respiratory arrest, near drowning, carbon monoxide poisoning, and  
6 asphyxia.<sup>3,4</sup> Previous research has shown that patients with HIBI place considerable burden on  
7 the health system, with approximately one in two patients experiencing at least one alternate  
8 level of care (ALC) day,<sup>5</sup> a negative system level outcome that is costly for the health system  
9 and patients waiting for appropriate care.

10 Readmission is an equally negative system level outcome that is costly to both the  
11 patient and the health system.<sup>6,7</sup> Between 2010-2011, 8.5% of Canadian patients were re-  
12 hospitalized within 30-days, resulting in an estimated \$1.8 billion associated cost to the  
13 healthcare system.<sup>8</sup> Data on the brain injury population show that readmission rates among  
14 patients with a traumatic brain injury (TBI) range from 16% to 29%,<sup>9-13</sup> with acute care costs  
15 accounting for 46% to 65% of care expenditures during the year post injury.<sup>14</sup> The aggregate  
16 first-year medical costs of TBI and nTBI patients were estimated at \$120.7 million and \$368.7  
17 million respectively, within the Ontario-wide population discharged between 2004 and 2007.<sup>14</sup>  
18 Factors associated with re-hospitalization among patients with TBI were age, injury severity,  
19 injury while on active duty, more comorbidities, previous acute care stays, inpatient  
20 rehabilitation length of stay (LOS), and acute care discharge functional status.<sup>13, 15-18</sup> Discharge  
21 to extended care facilities and inpatient rehabilitation facilities were also associated with 30-  
22 day readmission rates in older trauma patients.<sup>19</sup>

1  
2  
3 1 Most research on readmissions for brain injury-related events have focused on the TBI  
4  
5  
6 2 population, with many best-practice guidelines for the HIBI population modeled after those set  
7  
8 3 for TBI. This is problematic, as the HIBI population is distinct and differs significantly in terms of  
9  
10 4 their demographic, clinical and environmental profile.<sup>20</sup> Moreover, patients with HIBI  
11  
12 5 experience less functional improvement<sup>21, 22</sup> and greater psychosocial problems<sup>22</sup> in the long  
13  
14 6 term. It is currently unknown whether readmission rates and factors associated with  
15  
16 7 readmission identified among the TBI population are common to those with HIBI. As such,  
17  
18 8 planning and prevention of readmissions for HIBI using these data is vague and there is need for  
19  
20 9 evidence on HIBI-specific predictors of acute care readmission.  
21  
22  
23  
24

25 10 The objective of this study was to address this gap by identifying factors that predict the  
26  
27 11 number, and cumulative duration, of acute care readmissions among survivors of HIBI.  
28  
29 12 Understanding which factors predict readmissions can inform policy aimed at minimizing  
30  
31 13 avoidable readmissions, and thereby support effective HIBI-specific health planning for  
32  
33 14 Canadian survivors of these injuries.  
34  
35  
36  
37  
38  
39  
40 15  
41  
42  
43  
44  
45  
46  
47  
48  
49  
50  
51  
52  
53  
54  
55  
56  
57  
58  
59  
60

## 1 **Methods**

### 2 Study Design

3 A retrospective cohort study was conducted to analyze re-hospitalization rates among patients  
4 with HIBI within one year of acute care discharge. Population-based administrative data on  
5 acute care were extracted from the Canadian Institute of Health Information Discharge Abstract  
6 Database (DAD), which contains demographic and clinical information on all hospital discharges  
7 and deaths from all publicly funded hospitals in Ontario, Canada. Data in the DAD were  
8 obtained through the Ontario Cancer Data Linkage Program (cd-link). The cd-link is an initiative  
9 of the Ontario Institute for Cancer Research/Cancer Care Ontario Health Services Research  
10 Program, whereby risk reduced coded data from the Institute for Clinical Evaluative Sciences  
11 are provided directly to researchers with the protection of a comprehensive data use  
12 agreement.

### 14 Setting and Patients

15 Patients with HIBI who were 20 years or older and discharged from acute care between  
16 fiscal years 2002/03 and 2010/11 were identified from the DAD. Patients with HIBI were  
17 identified using International Classification of Diseases Version 10 (ICD-10) diagnostic codes  
18 G93.1 (anoxic brain damage) as the most responsible diagnosis for the acute care stay (MRDx)  
19 or I46.0 (cardiac arrest with successful resuscitation), R09.0 (asphyxia), R09.2 (respiratory  
20 arrest), T71 (asphyxiation), T75.1 (drowning and nonfatal submersion), G92 (toxic  
21 encephalopathy), T58 (toxic effect of carbon monoxide), and T70.2 (other and unspecified  
22 effects of high altitude) as the MRDx with G93.1 in any secondary diagnostic field.

## 1 *Outcomes*

2           The outcomes of interest were 1) number of acute care readmissions post index HIBI  
3 acute care discharge and 2) cumulative readmission duration, within one-year of index acute  
4 care discharge, defined as between 4 and 365 days (inclusive).

## 5 *Potential Predictors*

6           Potential demographic, clinical and health services predictors of readmissions within  
7 one year were assessed. The demographic variables included age at admission, sex,  
8 neighborhood income quintile and rurality, the latter two aggregated to the level of  
9 dissemination area, the smallest divisible geographical Canadian census unit. The clinical and  
10 acute care episode characteristics included fiscal year of acute care admission, special care  
11 hours, index acute care LOS, index acute care number of alternate level of care (ALC) days –  
12 days in which acute medical care is no longer required yet the patient still occupies an acute  
13 care bed<sup>23</sup>, presence of one or more psychological/behavioural conditions identified by a  
14 Chapter 5 ICD-10 code in any of the index admission diagnostic fields, and discharge disposition  
15 from index acute care admission. Comorbidity index was derived from a weighted sum of Johns  
16 Hopkins Aggregated Diagnosis Groups (ADGs)<sup>24</sup> accumulated over the two years prior to  
17 admission to the HIBI acute care episode. Healthcare utilization was measured using Adjusted  
18 Clinical Groups (ACG) Resource Utilization Band (RUB) score.<sup>25, 26</sup>

## 19 *Analyses*

20           Negative binomial count regression models were used to determine the independent  
21 relative effects of predictors on 1) the number of readmissions and 2) the duration of  
22



1 readmissions. Due to over-dispersion (Pearson's chi-square test), a Poisson distribution was not  
2 used. Visual inspection of predicted versus relative outcome frequencies indicated negligibly  
3 improved fit with a zero-inflated model. Multiple individual models comprised of each potential  
4 predictor and the outcome variable, were examined. Forward selection was used, where each  
5 potential predictor was entered from order of most significant (based on the likelihood ratio  
6 test from bivariable models) to least significant. Age and sex were forced into all models.  
7 Potential predictors were not retained if the p-value was  $> 0.1$ . Due to a high proportion of  
8 patients who died after the index acute care event, an offset variable was used to adjust  
9 person-time contribution.

## 11 Results

12 Between fiscal years 2002/03 and 2010/11, there were more than 2000 patients with a HIBI-  
13 related acute care visit (76% with ICD-10 code G93.1 as an MRDx). Among patients who  
14 survived their index acute care episode (N=593), 39.2% (n=233) were re-hospitalized within one  
15 year of discharge, some of whom were readmitted more than once (average readmissions=  
16  $1.79 \pm 1.31$ ), resulting in 417 readmissions. Of the index acute care episode survivors, 29.3% died  
17 within one year of discharge. The majority of readmissions had anoxic brain damage coded as  
18 the MRDx (66.2%), followed by cardiac arrest (16.1%), contributing to 4,758 inpatient hospital  
19 days (average duration of readmission stay= $20.42 \pm 39.21$  days) within 1-year of index acute care  
20 discharge. Hospitalizations with an anoxic brain damage and "awaiting admission to adequate  
21 facility elsewhere" (ICD-10:Z75.1) as the MRDx accounted for 13.6% and 8.20% of readmission  
22 days, respectively. Of those readmitted at least once, 46.4% were 65 years or older, 69.1%

1 were males, 88.8% had moderate to very high ACG RUB, 27.0% had more than 30 ADG  
2 comorbidities, 73.3% had an index acute care stay of 10 to 90 days, and 27% were discharged  
3 home post-index acute care event (Table 1).

4 Relative effects of potential predictors on the number of readmissions (Table 2, left) and  
5 duration of readmissions (Table 2, right), within 1-year of index HIBI-related acute care  
6 discharge are presented in Table 2. Data show that the rate of readmissions among patients 35  
7 to 49 years (RR: 0.57; 95% CI: 0.38-0.85) and 80 years or older (RR: 0.58; 95% CI: 0.34-0.97) was  
8 more than 40% lower than for patients 65 to 74 years; a reduced readmission rate was  
9 observed for patients 50 to 65 years (RR: 0.72; 95% CI: 0.52-1.00), though this was of borderline  
10 statistical significance. An index acute care episode ADG score of more than 30 was associated  
11 with a 60% (RR: 1.60; 95% CI: 1.11-2.31) increased rate of acute care readmission within 1-year,  
12 relative to those who have an ADG score of less than 10. There was suggestion of an increased  
13 likelihood of readmission with increasing amount of time spent in the special care unit, being  
14 free of a psychological/behavioural diagnosis, or having been discharged home or to inpatient  
15 rehabilitation instead of continuing/long-term care, though the point estimates were not  
16 statistically significant.

17 Compared to those whose index HIBI acute care episode was 90 days or more, patients  
18 with an index HIBI acute care episode of 10 to 30 and 31 to 90 days were likely to spend 2.88  
19 (RR: 2.88; 95% CI: 1.28-6.52) and 4.17 (RR: 4.17; 95% CI: 1.38-12.64) more days in hospital  
20 within a year following discharge for HIBI, respectively. Those that used minimal health services  
21 within the prior two years (ACG RUB healthy/none) were likely to spend 0.15-fold fewer days  
22 (RR: 0.15; 95% CI: 0.05-0.49) in the hospital during the year post index HIBI acute care episode

1 discharge relative to HIBI patients whose prior utilization of services was very high. Compared  
2 to patients discharged to complex continuing care/long-term care, those discharged home from  
3 their index acute care HIBI episode were likely to spend fewer days (RR: 0.44; 95% CI: 0.21-0.91)  
4 in an acute care bed during the following year. The interaction between age and sex was not  
5 significant in both models.

## 6 7 **Interpretation**

8 This is the first study to investigate predictors of re-hospitalizations specific to the HIBI  
9 population. Our findings suggest that the proportion of patients readmitted (39.2%) within one  
10 year of acute care discharge were higher than that for patients with TBI (16% - 29%).<sup>11-13</sup>  
11 Observed predictors of fewer readmissions are both older and younger age relative to patients  
12 65 to 79 years, while prior comorbidity is associated with more readmissions. Observed  
13 predictors of cumulative duration of readmissions are having more than minimal prior contact  
14 with the healthcare system, an index episode LOS between 10 and 90 days, and being  
15 discharged to continuing/long-term care after the index acute episode instead of home.

16 These findings are similar to those identified for TBI, medical and surgical patients, and  
17 all-cause readmissions.<sup>27</sup> It is plausible that patients between 35 and 64 years are less likely to  
18 have readmissions following survival of an acute care stay for HIBI because they are less frail  
19 than the 65 to 79 years of age reference group. The oldest patients who survive their HIBI acute  
20 care episode may be less likely to have acute care readmissions chiefly due to having less  
21 severe HIBI injuries, contributing to their survival of index acute care episode when almost 80%

1  
2  
3 1 of HIBI patients admitted to acute care die in hospital.<sup>5</sup> Socioeconomic status indicators such as  
4  
5  
6 2 neighborhood income quintile and rurality were not associated with readmission in this study, a  
7  
8 3 finding consistent with the all-cause readmission by Canadian Institute for Health Information.<sup>8</sup>  
9  
10

11 4 Discharge to home, instead of continuing/long-term care, from the index acute care  
12  
13  
14 5 episode is associated with a greater number of readmissions, but fewer days in acute care over  
15  
16 6 the year. Studies have shown that discharge destination other than home is independently  
17  
18 7 associated with increased rate of readmission in TBI and other trauma populations<sup>19, 27</sup> and is  
19  
20  
21 8 likely an indicator of medical complexity and injury severity. Re-hospitalization among patients  
22  
23  
24 9 with TBI has been suggested to arise from post discharge care that is ill-equipped to resolve  
25  
26 10 sudden complications and prevention protocols planning for such events have been  
27  
28 11 recommended.<sup>28</sup> Our finding also suggests that this group of HIBI acute care survivors may, on  
29  
30  
31 12 average, be lacking caregiver support at home, and thus, may experience a greater number of  
32  
33  
34 13 readmissions. However, overall, they may be less complex medically due to a less severe HIBI or  
35  
36 14 comorbidity profile, and therefore, spending fewer days in the acute care when readmitted.  
37

38 15 There is growing evidence that care of complex patients can benefit substantially from  
39  
40  
41 16 interdisciplinary team-based models. These can facilitate more optimal management of  
42  
43  
44 17 comorbid health conditions during acute care as well as improved coordination of discharge  
45  
46 18 planning to ensure the necessary formal and informal supports are in place.<sup>29</sup> Strategies  
47  
48 19 including the introduction of new sub-acute care facilities, auxiliary nurses to support specialist  
49  
50  
51 20 nursing staff, and patient-held summaries of specialist consultations may prevent inappropriate  
52  
53 21 admissions or reduce LOS<sup>30</sup>, avoiding the decline into frailty characteristic of patients who linger  
54  
55  
56 22 unnecessarily in hospital.<sup>31</sup> Adequate planning and support services during the transition from  
57  
58  
59  
60

1 inpatient/rehabilitation to home and afterwards is crucial in preventing the exacerbation of  
2 care needs, manageable in the current setting, into those requiring readmission. Transition  
3 supports emphasizing a more holistic approach to patient care both pre and post discharge and  
4 available homecare have been demonstrated to maximize functional independence, overall  
5 health and directly prevent readmissions.<sup>32, 33</sup> Health professionals and service organizations  
6 should factor in individual need in context of available family and social supports, as well as be  
7 aware of ongoing healthcare and rehabilitation needs to facilitate access to required services.  
8 These processes require co-ordination between multiple healthcare, social and community  
9 support systems.

10

### 11 **Strengths and Limitations**

12 Limitations associated with the use of health administrative data are recognized. Many factors  
13 that contribute to readmission such as injury severity, social support and availability of private  
14 insurance were not available. There is currently no consensus on the case definition for HIBI  
15 and milder cases of HIBI may be missed in health administrative data, resulting in an  
16 underreported number of patients with HIBI. This was addressed by including patients with an  
17 anoxic brain damage ICD-10 code as a secondary acute care diagnosis, with MRDx consistent  
18 with causes of HIBI.

19

20 Nonetheless, this is the first study to report readmissions among patients with a HIBI-related  
21 acute care event at a population level in a publicly funded health system. Furthermore, a  
22 quality assessment of DAD indicated near-perfect agreement for non-clinical variables and

1  
2  
3 1 moderate to substantial agreement for the most responsible diagnosis.<sup>34</sup> Finally, findings from  
4  
5 2 this Ontario-wide study represent a substantial proportion (39%) of the Canadian population  
6  
7  
8 3 and may be generalizable to jurisdictions with comparable acute care health systems and post-  
9  
10 4 acute care formal and informal support structures.

## 6 **Conclusion**

7 This study suggests that between fiscal years 2002/03 and 2010/11, more than 1 in 3 patients  
8  
9 8 with a HIBI-related acute care admission were readmitted within 1-year of discharge. Findings  
10  
11 9 support literature on other brain-injured populations that interdisciplinary teams in the  
12  
13 10 inpatient setting for patients with HIBI would be beneficial, and highlight an unmet need for  
14  
15 11 appropriate and adequate support in the transition from inpatient to home. This includes the  
16  
17 12 provision of homecare services to ensure that patients are adequately cared for post discharge.  
18  
19 13 This study also highlights the need for HIBI-specific research to support evidence-based best  
20  
21 14 practice in meeting the needs of these unique patients. Findings from this study will help  
22  
23 15 inform health service planning for this understudied population, thereby preventing avoidable  
24  
25 16 care gaps and health system inefficiencies of which readmission rates are an indicator.  
26  
27  
28  
29  
30  
31  
32  
33  
34  
35  
36  
37  
38  
39  
40  
41  
42  
43  
44  
45  
46  
47  
48  
49  
50  
51  
52  
53  
54  
55  
56  
57  
58  
59  
60

**Table 1: Characteristics of patients with hypoxic ischemic brain injury (HIBI) in the acute care setting and readmission within 1-year of acute care discharge, Ontario, Canada, 2002/03 – 2010/11**

| Characteristics          | HIBI Discharges<br>(N=593) | Readmission within 1yr<br>(n=233) |
|--------------------------|----------------------------|-----------------------------------|
|                          | N (%)                      | N (%)                             |
| Age at admission (years) |                            |                                   |
| 20 - 34                  | 54 (9.1)                   | 20 (8.5)                          |
| 35 - 49                  | 107 (18.0)                 | 35 (15.0)                         |
| 50 - 64                  | 189 (31.9)                 | 70 (30.0)                         |
| 65 - 79                  | 188 (31.7)                 | 85 (36.5)                         |
| 80+                      | 55 (9.3)                   | 23 (9.9)                          |
| Sex                      |                            |                                   |
| Females                  | 204 (34.4)                 | 72 (30.9)                         |
| Males                    | 389 (65.6)                 | 161 (69.1)                        |
| Income Quintiles         |                            |                                   |
| Quintile 1 (lowest)      | 165 (27.8)                 | 62 (26.6)                         |
| Quintile 2               | 126 (21.2)                 | 52 (22.3)                         |
| Quintile 3               | 105 (17.7)                 | 42 (18.0)                         |
| Quintile 4               | 123 (20.7)                 | 52 (22.3)                         |
| Quintile 5 (highest)     | 74 (12.5)                  | 25 (10.7)                         |
| Rurality                 |                            |                                   |
| Rural                    | 58 (9.8)                   | 23 (9.9)                          |
| Urban                    | 535 (90.2)                 | 210 (90.1)                        |
| ACG RUB                  |                            |                                   |
| None or healthy          | 34 (5.7)                   | 13 (5.6)                          |
| Low                      | 35 (5.9)                   | 13 (5.6)                          |
| Moderate                 | 198 (33.4)                 | 75 (32.2)                         |
| High                     | 152 (25.6)                 | 56 (24.0)                         |
| Very high                | 174 (29.3)                 | 76 (32.6)                         |
| ADG Comorbidity Index    |                            |                                   |
| <10                      | 187 (31.5)                 | 69 (29.6)                         |
| 10-30                    | 265 (44.7)                 | 101 (43.4)                        |
| >30                      | 141 (23.8)                 | 63 (27.0)                         |
| Fiscal Year              |                            |                                   |
| 2002-2003                | 137 (23.1)                 | 50 (21.5)                         |
| 2004-2005                | 123 (20.7)                 | 51 (21.9)                         |
| 2006-2007                | 131 (22.1)                 | 50 (21.5)                         |
| 2008-2009                | 138 (23.3)                 | 56 (24.0)                         |
| 2010                     | 64 (10.8)                  | 26 (11.2)                         |
| Special Care hours       |                            |                                   |
| None                     | 86 (14.5)                  | 31 (13.3)                         |
| 1-499                    | 333 (56.2)                 | 127 (54.5)                        |
| 500-999                  | 95 (16.0)                  | 40 (17.2)                         |
| 1000+                    | 79 (13.3)                  | 35 (15.0)                         |
| Index DAD LOS (days)     |                            |                                   |
| <10                      | 119 (20.1)                 | 37 (15.9)                         |
| 10 - 30                  | 203 (34.2)                 | 77 (33.0)                         |
| 31 - 90                  | 210 (35.4)                 | 94 (40.3)                         |
| >90                      | 61 (10.3)                  | 25 (10.7)                         |
| DAD ALC (days)           |                            |                                   |
| 0                        | 354 (59.7)                 | 131 (56.2)                        |
| 1-14                     | 100 (16.9)                 | 44 (18.9)                         |
| >14                      | 139 (23.4)                 | 58 (24.9)                         |
| Psychological/Behavioral |                            |                                   |

1  
2  
3  
4  
5  
6  
7  
8  
9  
10  
11  
12  
13  
14  
15  
16  
17  
18  
19  
20  
21  
22  
23  
24  
25  
26  
27  
28  
29  
30  
31  
32  
33  
34  
35  
36  
37  
38  
39  
40  
41  
42  
43  
44  
45  
46  
47  
48  
49  
50  
51  
52  
53  
54  
55  
56  
57  
58  
59  
60

|                       |            |            |
|-----------------------|------------|------------|
| Absent                | 452 (76.2) | 185 (79.4) |
| Present               | 141 (23.8) | 48 (20.6)  |
| Discharge Disposition |            |            |
| Home                  | 130 (21.9) | 63 (27.0)  |
| Rehabilitation        | 122 (20.6) | 54 (23.2)  |
| Continued Care        | 181 (30.5) | 62 (26.6)  |
| Other                 | 160 (27.0) | 54 (23.2)  |

Note: ACG= Adjusted Clinical Group, ADG= Aggregated Diagnostic Group, RUB= Resource Utilization Band, SCU= Special Care Unit, ALC= Alternate Level of Care.

Confidential



**Table 2: Rate ratios (RR) and 95% confidence intervals (CI) for predictors of number of readmissions (left), and cumulative duration of readmission (right), within 1-year of acute care discharge, Ontario, Canada, 2002/03 – 2010/11, (N=593).**

| Potential Predictors           | Number of Readmissions<br>RR (95% CI) | Cumulative Duration of<br>Readmission (Days)<br>RR (95% CI) |
|--------------------------------|---------------------------------------|-------------------------------------------------------------|
| Age at admission (years)       |                                       |                                                             |
| 20-34                          | 0.93 (0.57-1.51)                      | 0.64 (0.25-1.67)                                            |
| 35-49                          | 0.57 (0.38-0.85)                      | 0.51 (0.23-1.09)                                            |
| 50-64                          | 0.72 (0.52-1.00)                      | 0.71 (0.37-1.39)                                            |
| 65-79                          | 1.00                                  | 1.00                                                        |
| 80+                            | 0.58 (0.34-0.97)                      | 0.70 (0.27-1.80)                                            |
| Sex                            |                                       |                                                             |
| Females                        | 1.06 (0.80-1.40)                      | 1.03 (0.57-1.86)                                            |
| Males                          | 1.00                                  | 1.00                                                        |
| ACG RUB                        | NR                                    |                                                             |
| None or healthy                |                                       | 0.15 (0.05-0.49)                                            |
| Low                            |                                       | 0.85 (0.24-3.02)                                            |
| Moderate                       |                                       | 0.68 (0.36-1.28)                                            |
| High                           |                                       | 0.71 (0.37-1.40)                                            |
| Very high                      |                                       | 1.00                                                        |
| ADG Comorbidity Index          |                                       | NR                                                          |
| <10                            | 1.00                                  |                                                             |
| 10-30                          | 1.19 (0.85-1.65)                      |                                                             |
| >30                            | 1.60 (1.11-2.31)                      |                                                             |
| Length of Index Episode (days) | NR                                    |                                                             |
| <10                            |                                       | 1.67 (0.78-3.59)                                            |
| 10-30                          |                                       | 2.88 (1.28-6.52)                                            |
| 31-90                          |                                       | 4.17 (1.38-12.64)                                           |
| >90                            |                                       | 1.00                                                        |
| Special Care Hours             |                                       | NR                                                          |
| None                           | 0.88 (0.58-1.33)                      |                                                             |
| 1-499                          | 1.00                                  |                                                             |
| 500-999                        | 1.22 (0.85-1.77)                      |                                                             |
| 1000+                          | 1.47 (0.98-2.19)                      |                                                             |
| Psychological Behavior         |                                       | NR                                                          |
| Absent                         | 1.00                                  |                                                             |
| Present                        | 0.73 (0.52-1.01)                      |                                                             |
| Discharge Disposition          |                                       |                                                             |
| Home                           | 1.41 (0.97-2.06)                      | 0.44 (0.21-0.91)                                            |
| Rehabilitation                 | 1.43 (0.97-2.09)                      | 1.25 (0.60-2.63)                                            |
| Continued Care                 | 1.00                                  | 1.00                                                        |
| Other                          | 1.09 (0.74-1.60)                      | 1.73 (0.74-4.06)                                            |

Note: ACG= Adjusted Clinical Group, ADG=Aggregated Diagnostic Group, RUB= Resource Utilization Band, NR=not retained in the model

## References

1. Howard RS, Holmes PA, Koutroumanidis MA. Hypoxic-ischaemic brain injury. *Pract Neurol*. 2011;11(1):4-18.
2. Arciniegas DB. Hypoxic-ischemic brain injury: addressing the disconnect between pathophysiology and public policy. *NeuroRehabilitation*. 2010;26(1):1-4.
3. Lim C, Alexander MP, LaFleche G, Schnyer DM, Verfaellie M. The neurological and cognitive sequelae of cardiac arrest. *Neurology*. 2004;63(10):1774-1778.
4. Busl KM, Greer DM. Hypoxic-ischemic brain injury: pathophysiology, neuropathology and mechanisms. *NeuroRehabilitation*. 2010;26(1):5-13.
5. Stock D, Cowie C, Chan V, Colantonio A, Wodchis WP, Alter D, Cullen N. Determinants of alternate-level-of-care delayed discharge among acute care survivors of hypoxic-ischemic brain injury: a population-based cohort study. *CMAJ Open*. 2016;4(4):E689-E697.
6. Jencks SF, Williams MV, Coleman EA. Rehospitalizations among patients in the Medicare fee-for-service program. *N Engl J Med*. 2009;360(14):1418-1428.
7. Anderson GF, Steinberg EP. Hospital readmissions in the Medicare population. *N Engl J Med*. 1984;311(21):1349-1353.
8. All-Cause Readmission to Acute Care and Return to the Emergency Department. *Health system Performance, Canadian Institute for Health Informaiton*.
9. Intiso D, Fontana A, Maruzzi G, Tolfa M, Copetti M, F DIR. Readmission to the acute care unit and functional outcomes in patients with severe brain injury during rehabilitation. *Eur J Phys Rehabil Med*. 2017;53(2):268-276.
10. Nakase-Richardson R, Tran J, Cifu D, Barnett SD, Horn LJ, Greenwald BD, Brunner RC, Whyte J, Hammond FM, Yablon SA, Giacino JT. Do rehospitalization rates differ among injury severity levels in the NIDRR Traumatic Brain Injury Model Systems program? *Arch Phys Med Rehabil*. 2013;94(10):1884-1890.
11. Marwitz JH, Cifu DX, Englander J, High WM, Jr. A multi-center analysis of rehospitalizations five years after brain injury. *J Head Trauma Rehabil*. 2001;16(4):307-317.
12. Cifu DX, Kreutzer JS, Marwitz JH, Miller M, Hsu GM, Seel RT, Englander J, High WM, Jr., Zafonte R. Etiology and incidence of rehospitalization after traumatic brain injury: a multicenter analysis. *Arch Phys Med Rehabil*. 1999;80(1):85-90.
13. Saverino C, Swaine B, Jaglal S, Lewko J, Vernich L, Voth J, Calzavara A, Colantonio A. Rehospitalization After Traumatic Brain Injury: A Population-Based Study. *Arch Phys Med Rehabil*. 2016;97(2 Suppl):S19-25.
14. Chen A, Bushmeneva K, Zagorski B, Colantonio A, Parsons D, Wodchis WP. Direct cost associated with acquired brain injury in Ontario. *BMC Neurol*. 2012;12:76.
15. Tran J, Hammond F, Dams-O'Connor K, Tang X, Eapen B, McCarthy M, Nakase-Richardson R. Rehospitalization in the First Year Following Veteran and Service Member TBI: A VA TBI Model Systems Study. *Journal of Head Trauma Rehabilitation*. 2017:1.
16. Pretz CR, Graham JE, Middleton A, Karmarkar AM, Ottenbacher KJ. Longitudinal Investigation of Rehospitalization Patterns in Spinal Cord Injury and Traumatic Brain Injury Among Medicare Beneficiaries. *Arch Phys Med Rehabil*. 2017;98(5):997-1003.
17. Chan V, Zagorski B, Parsons D, Colantonio A. Older adults with acquired brain injury: a population based study. *BMC Geriatr*. 2013;13:97.
18. Colantonio A, Croxford R, Farooq S, Laporte A, Coyte PC. Trends in hospitalization associated with traumatic brain injury in a publicly insured population, 1992-2002. *J Trauma*. 2009;66(1):179-183.

- 1  
2  
3  
4  
5  
6  
7  
8  
9  
10  
11  
12  
13  
14  
15  
16  
17  
18  
19  
20  
21  
22  
23  
24  
25  
26  
27  
28  
29  
30  
31  
32  
33  
34  
35  
36  
37  
38  
39  
40  
41  
42  
43  
44  
45  
46  
47  
48  
49  
50  
51  
52  
53  
54  
55  
56  
57  
58  
59  
60
19. Strosberg DS, Housley BC, Vazquez D, Rushing A, Steinberg S, Jones C. Discharge destination and readmission rates in older trauma patients. *J Surg Res.* 2017;207:27-32.
  20. Colantonio A, Gerber G, Bayley M, Deber R, Yin J, Kim H. Differential profiles for patients with traumatic and non-traumatic brain injury. *J Rehabil Med.* 2011;43(4):311-315.
  21. Cullen NK, Park YG, Bayley MT. Functional recovery following traumatic vs non-traumatic brain injury: a case-controlled study. *Brain Inj.* 2008;22(13-14):1013-1020.
  22. Harbinson M, Zarshenas S, Cullen NK. Long-Term Functional and Psychosocial Outcomes After Hypoxic-Ischemic Brain Injury: A Case-Controlled Comparison to Traumatic Brain Injury. *PM R.* 2017.
  23. Amy C, Zagorski B, Chan V, Parsons D, Vander Laan R, Colantonio A. Acute care alternate-level-of-care days due to delayed discharge for traumatic and non-traumatic brain injuries. *Healthc Policy.* 2012;7(4):41-55.
  24. Austin PC, van Walraven C, Wodchis WP, Newman A, Anderson GM. Using the Johns Hopkins Aggregated Diagnosis Groups (ADGs) to predict mortality in a general adult population cohort in Ontario, Canada. *Med Care.* 2011;49(10):932-939.
  25. Zielinski A, Kronogard M, Lenhoff H, Halling A. Validation of ACG Case-mix for equitable resource allocation in Swedish primary health care. *BMC Public Health.* 2009;9:347.
  26. Brilleman SL, Salisbury C. Comparing measures of multimorbidity to predict outcomes in primary care: a cross sectional study. *Fam Pract.* 2013;30(2):172-178.
  27. Moore L, Stelfox HT, Turgeon AF, Nathens AB, Le Sage N, Emond M, Bourgeois G, Lapointe J, Gagne M. Rates, patterns, and determinants of unplanned readmission after traumatic injury: a multicenter cohort study. *Ann Surg.* 2014;259(2):374-380.
  28. Hammond FM, Horn SD, Smout RJ, Beaulieu CL, Barrett RS, Ryser DK, Sommerfeld T. Readmission to an Acute Care Hospital During Inpatient Rehabilitation for Traumatic Brain Injury. *Archives of physical medicine and rehabilitation.* 2015;96(8 Suppl):S293-S303.e291.
  29. O'Leary KJ, Sehgal NL, Terrell G, Williams MV, High Performance T, the Hospital of the Future Project T. Interdisciplinary teamwork in hospitals: a review and practical recommendations for improvement. *J Hosp Med.* 2012;7(1):48-54.
  30. Hammond CL, Pinnington LL, Phillips MF. A qualitative examination of inappropriate hospital admissions and lengths of stay. *BMC Health Serv Res.* 2009;9:44.
  31. Sutherland JM, Crump RT. Alternative level of care: Canada's hospital beds, the evidence and options. *Healthcare Policy = Politiques de sante.* 2013;9(1):26-34.
  32. Courtney MD, Edwards HE, Chang AM, Parker AW, Finlayson K, Bradbury C, Nielsen Z. Improved functional ability and independence in activities of daily living for older adults at high risk of hospital readmission: a randomized controlled trial. *J Eval Clin Pract.* 2012;18(1):128-134.
  33. Tinetti ME, Charpentier P, Gottschalk M, Baker DI. Effect of a restorative model of posthospital home care on hospital readmissions. *J Am Geriatr Soc.* 2012;60(8):1521-1526.
  34. Juurlink D, Preyra C, Croxford R, Chong A, AUSTIN P, Tu Jack, Laupacis A. *Canadian Institute for Health Information Discharge Abstract Database: A validation study*: Institute for Clinical Evaluative Sciences; 2006.

## STROBE Statement—checklist of items that should be included in reports of observational studies

|                              | Item No | Recommendation                                                                                                                                                                                                                                                                                                                                                                                                                                                                                                                                                                                                                                                                                            |
|------------------------------|---------|-----------------------------------------------------------------------------------------------------------------------------------------------------------------------------------------------------------------------------------------------------------------------------------------------------------------------------------------------------------------------------------------------------------------------------------------------------------------------------------------------------------------------------------------------------------------------------------------------------------------------------------------------------------------------------------------------------------|
| <b>Title and abstract</b>    | 1       | (a) Indicate the study's design with a commonly used term in the title or the abstract – Page 1                                                                                                                                                                                                                                                                                                                                                                                                                                                                                                                                                                                                           |
|                              |         | (b) Provide in the abstract an informative and balanced summary of what was done and what was found – Page 3                                                                                                                                                                                                                                                                                                                                                                                                                                                                                                                                                                                              |
| <b>Introduction</b>          |         |                                                                                                                                                                                                                                                                                                                                                                                                                                                                                                                                                                                                                                                                                                           |
| Background/rationale         | 2       | Explain the scientific background and rationale for the investigation being reported Page 5                                                                                                                                                                                                                                                                                                                                                                                                                                                                                                                                                                                                               |
| Objectives                   | 3       | State specific objectives, including any prespecified hypotheses - Page 6                                                                                                                                                                                                                                                                                                                                                                                                                                                                                                                                                                                                                                 |
| <b>Methods</b>               |         |                                                                                                                                                                                                                                                                                                                                                                                                                                                                                                                                                                                                                                                                                                           |
| Study design                 | 4       | Present key elements of study design early in the paper – Page 7                                                                                                                                                                                                                                                                                                                                                                                                                                                                                                                                                                                                                                          |
| Setting                      | 5       | Describe the setting, locations, and relevant dates, including periods of recruitment, exposure, follow-up, and data collection - Page 7                                                                                                                                                                                                                                                                                                                                                                                                                                                                                                                                                                  |
| Participants                 | 6       | (a) <i>Cohort study</i> —Give the eligibility criteria, and the sources and methods of selection of participants. Describe methods of follow-up - Page 7<br><i>Case-control study</i> —Give the eligibility criteria, and the sources and methods of case ascertainment and control selection. Give the rationale for the choice of cases and controls<br><i>Cross-sectional study</i> —Give the eligibility criteria, and the sources and methods of selection of participants<br>(b) <i>Cohort study</i> —For matched studies, give matching criteria and number of exposed and unexposed<br><i>Case-control study</i> —For matched studies, give matching criteria and the number of controls per case |
| Variables                    | 7       | Clearly define all outcomes, exposures, predictors, potential confounders, and effect modifiers. Give diagnostic criteria, if applicable Page 8                                                                                                                                                                                                                                                                                                                                                                                                                                                                                                                                                           |
| Data sources/<br>measurement | 8*      | For each variable of interest, give sources of data and details of methods of assessment (measurement). Describe comparability of assessment methods if there is more than one group - Page 8                                                                                                                                                                                                                                                                                                                                                                                                                                                                                                             |
| Bias                         | 9       | Describe any efforts to address potential sources of bias – Page 9                                                                                                                                                                                                                                                                                                                                                                                                                                                                                                                                                                                                                                        |
| Study size                   | 10      | Explain how the study size was arrived at – Page 7                                                                                                                                                                                                                                                                                                                                                                                                                                                                                                                                                                                                                                                        |
| Quantitative variables       | 11      | Explain how quantitative variables were handled in the analyses. If applicable, describe which groupings were chosen and why - Page 8                                                                                                                                                                                                                                                                                                                                                                                                                                                                                                                                                                     |
| Statistical methods          | 12      | (a) Describe all statistical methods, including those used to control for confounding - Page 8 & 9<br>(b) Describe any methods used to examine subgroups and interactions<br>(c) Explain how missing data were addressed<br>(d) <i>Cohort study</i> —If applicable, explain how loss to follow-up was addressed<br><i>Case-control study</i> —If applicable, explain how matching of cases and controls was addressed<br><i>Cross-sectional study</i> —If applicable, describe analytical methods taking account of sampling strategy<br>(e) Describe any sensitivity analyses                                                                                                                            |

Continued on next page

**Results**

|                  |     |                                                                                                                                                                                                                                                                                                                                                                                                                                                 |
|------------------|-----|-------------------------------------------------------------------------------------------------------------------------------------------------------------------------------------------------------------------------------------------------------------------------------------------------------------------------------------------------------------------------------------------------------------------------------------------------|
| Participants     | 13* | (a) Report numbers of individuals at each stage of study—eg numbers potentially eligible, examined for eligibility, confirmed eligible, included in the study, completing follow-up, and analysed – <a href="#">Page 9</a><br>(b) Give reasons for non-participation at each stage<br>(c) Consider use of a flow diagram                                                                                                                        |
| Descriptive data | 14* | (a) Give characteristics of study participants (eg demographic, clinical, social) and information on exposures and potential confounders - <a href="#">Page 15</a><br>(b) Indicate number of participants with missing data for each variable of interest<br>(c) <i>Cohort study</i> —Summarise follow-up time (eg, average and total amount)                                                                                                   |
| Outcome data     | 15* | <i>Cohort study</i> —Report numbers of outcome events or summary measures over time – <a href="#">Page 9</a><br><i>Case-control study</i> —Report numbers in each exposure category, or summary measures of exposure<br><i>Cross-sectional study</i> —Report numbers of outcome events or summary measures                                                                                                                                      |
| Main results     | 16  | (a) Give unadjusted estimates and, if applicable, confounder-adjusted estimates and their precision (eg, 95% confidence interval). Make clear which confounders were adjusted for and why they were included – <a href="#">Page 9 &amp; 10</a><br>(b) Report category boundaries when continuous variables were categorized<br>(c) If relevant, consider translating estimates of relative risk into absolute risk for a meaningful time period |
| Other analyses   | 17  | Report other analyses done—eg analyses of subgroups and interactions, and sensitivity analyses -                                                                                                                                                                                                                                                                                                                                                |

**Discussion**

|                  |    |                                                                                                                                                                                                                |
|------------------|----|----------------------------------------------------------------------------------------------------------------------------------------------------------------------------------------------------------------|
| Key results      | 18 | Summarise key results with reference to study objectives – <a href="#">Page 11</a>                                                                                                                             |
| Limitations      | 19 | Discuss limitations of the study, taking into account sources of potential bias or imprecision. Discuss both direction and magnitude of any potential bias - <a href="#">Page 13</a>                           |
| Interpretation   | 20 | Give a cautious overall interpretation of results considering objectives, limitations, multiplicity of analyses, results from similar studies, and other relevant evidence – <a href="#">Page 11,12,13, 14</a> |
| Generalisability | 21 | Discuss the generalisability (external validity) of the study results – <a href="#">Page 14</a>                                                                                                                |

**Other information**

|         |    |                                                                                                                                                                                        |
|---------|----|----------------------------------------------------------------------------------------------------------------------------------------------------------------------------------------|
| Funding | 22 | Give the source of funding and the role of the funders for the present study and, if applicable, for the original study on which the present article is based – <a href="#">Page 1</a> |
|---------|----|----------------------------------------------------------------------------------------------------------------------------------------------------------------------------------------|

\*Give information separately for cases and controls in case-control studies and, if applicable, for exposed and unexposed groups in cohort and cross-sectional studies.

**Note:** An Explanation and Elaboration article discusses each checklist item and gives methodological background and published examples of transparent reporting. The STROBE checklist is best used in conjunction with this article (freely available on the Web sites of PLoS Medicine at <http://www.plosmedicine.org/>, Annals of Internal Medicine at <http://www.annals.org/>, and Epidemiology at <http://www.epidem.com/>). Information on the STROBE Initiative is available at [www.strobe-statement.org](http://www.strobe-statement.org).
